# Supplementary material for: Neural Specialization for English and Arabic Print in Early Readers
Source: PubMed Central journal article supplement (PMC10783792; doi:10.1162/nol_a_00119), 2023-12-14
Supplement: nol-4-4-639-s001.pdf [file nol-4-4-639-s001.pdf]

1 Supplemental Information

2 (Note that the size of stimuli was standardized for size during the experiment)

3 Arabic word stimuli

4 أسد

(Assad)

9 سمكة

(Samaka)

5 كرسي

(Kursei)

10 شجرة

(Shajara)

6 فيل

(Feel)

11 باب

(Baab)

7 كتاب

(Kitaab)

12 جزر

(Jozzar)

8 موز

(Moz)

13 قلم

(Qalam)

14

15 Arabic false font string stimuli

16 ك ا ح م ب

16

18 ل ت ه ج

18

17 ح ن ك ت ه

17

19 ل ن ك ج ح

19

ح ز پ کا ع

20

س ج ت و ح ن ف ب

21

کا ح ج ح

22

26

27 English word stimuli

lion

28

saw

29

key

30

chair

31

ball

32

38

39 English false font string stimuli

ƒ ۛ ۛ ۛ ۛ

40

ف ب ز ع س ج

23

پ ح ج کا

24

ح ج س ج ت و

25

cone

33

fish

34

berry

35

cat

36

bird

37

ۛ ۛ ۛ ۛ

41

42

ተሠጋ

43

በተላላ

44

ሠናቻ

45

ጋላት

50

51

46

ተሠጋ

47

ለሰጠ

48

ሰጠው

49

ናሰጠ
